# Supplementary material for: H2-Induced coalescence of Pt nanoparticles for the preparation of ultrathin Pt nanowires with high-density planar defects
Source: Royal Society of Chemistry journal article supplement (doi:10.1039/c9nr04349g), 2019-01-01
Supplement: c9nr04349g1.pdf [file c9nr04349g1.pdf]

Electronic Supplementary Information for

**H<sub>2</sub>-induced coalescence of Pt nanoparticles for the preparation of ultrathin Pt nanowires with high-density planar defects**

Yaming Liu, Chaoqi Wang, Weicong Wang, Ruiyun Guo, Wei Bi, Yanjun Guo and Mingshang Jin\*

Frontier Institute of Science and Technology and State Key Laboratory of Multiphase Flow in Power Engineering, Xi'an Jiaotong University, Xi'an, Shaanxi 710049, China.

E-mail: [jnm@mail.xjtu.edu.cn](mailto:jnm@mail.xjtu.edu.cn)

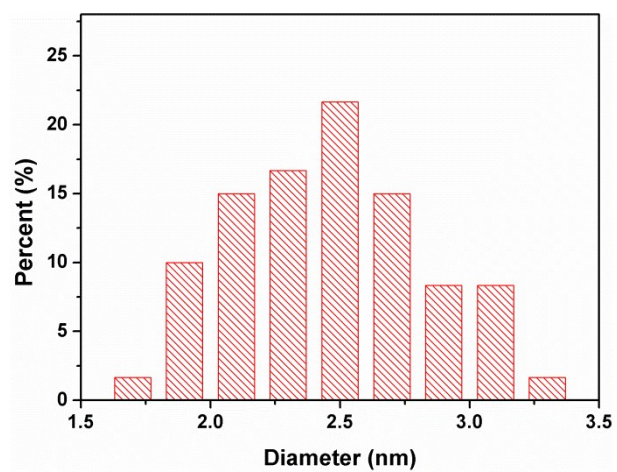

**Figure S1** Diameter distribution of the ultrathin Pt nanowires.

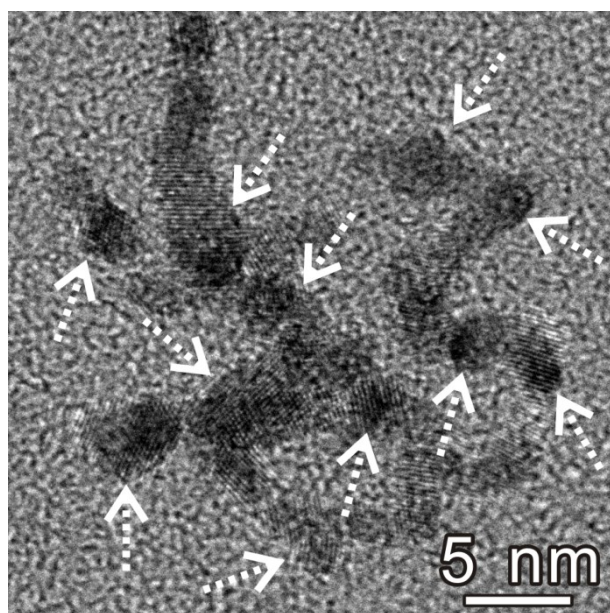

**Figure S2** The high-magnification TEM image of the ultrathin Pt nanowires. White arrows indicate multiple crystalline domains.

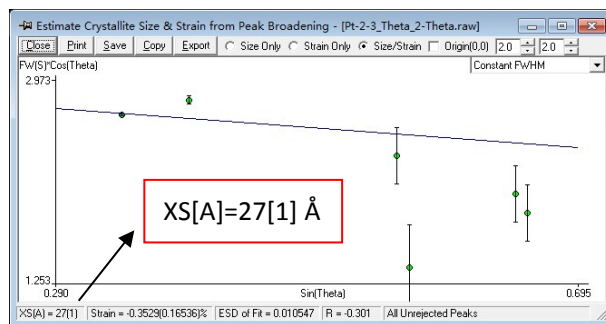

**Figure S3** Particle size of ultrathin Pt nanowires calculated based on Scherrer's equation.

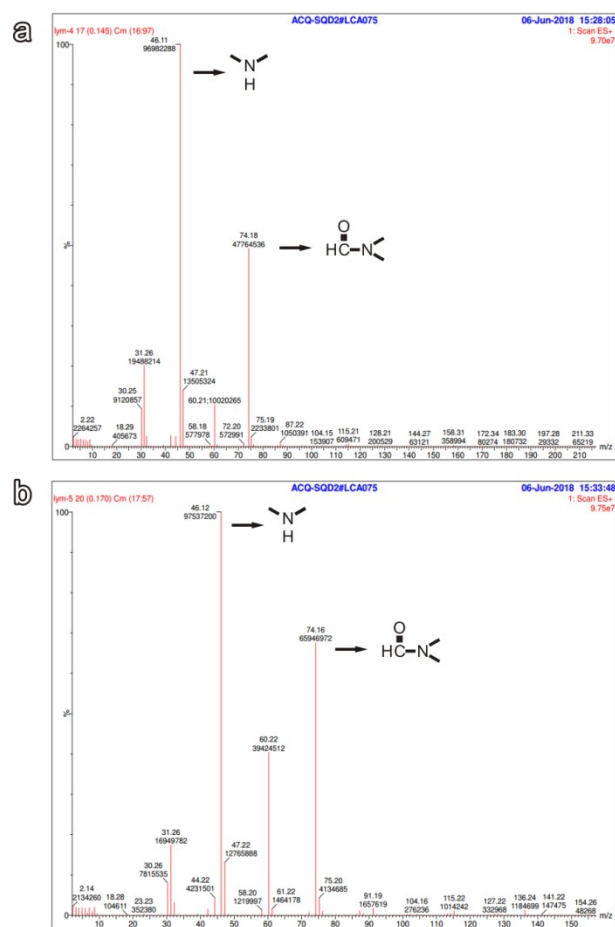

**Figure S4** MS analysis of the liquid products by treating different solvents at 160 °C for 10 h: (a) A mixture of 2 mL DMF and 3 mL H<sub>2</sub>O, and (b) pure DMF.

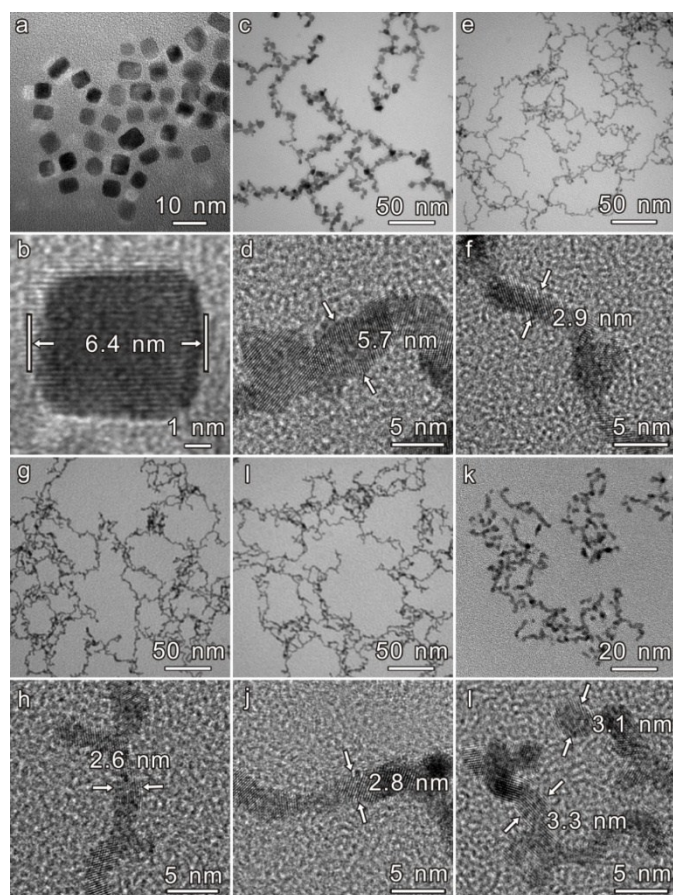

**Figure S5** TEM (a, c, e, g, i, k) and HRTEM images (b, d, f, h, j, l) of Pt nanocrystals obtained under a standard condition except different ratios of DMF/H<sub>2</sub>O. (a, b) 5 : 0, (c, d) 4 : 1, (e, f) 3 : 2, (g, h) 2 : 3, (i, j) 1 : 4, (k, l) 1 : 9.

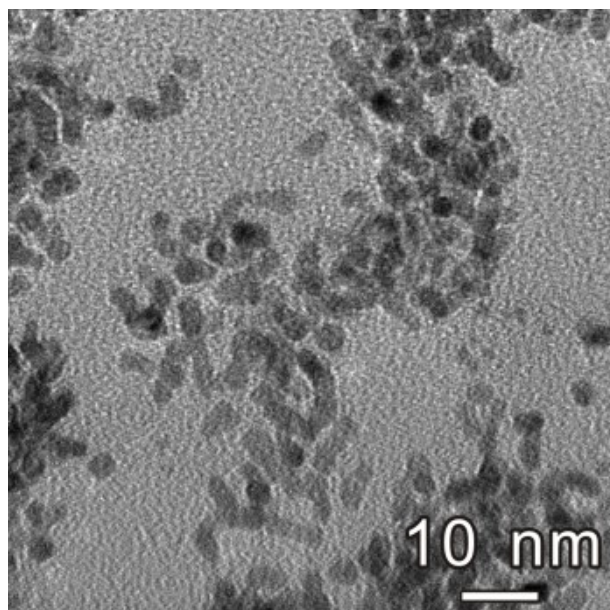

**Figure S6** TEM of Pt nanocrystals obtained in pure DMF solution while  $H_2$  was further added into the reaction system to induce the coalescence of Pt nanoparticles.

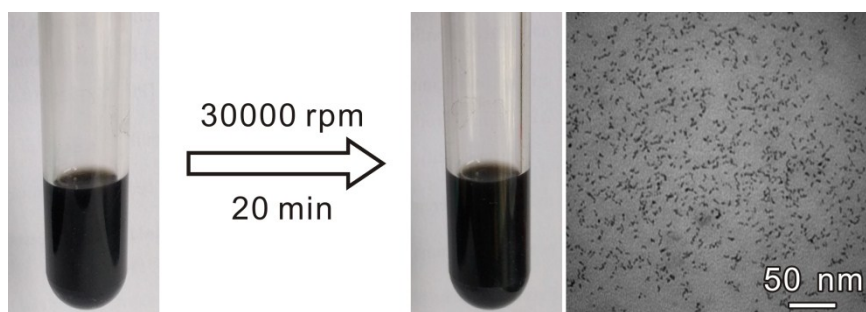

**Figure S7** The products obtained in pure water (DMF/H<sub>2</sub>O is 0 : 5).



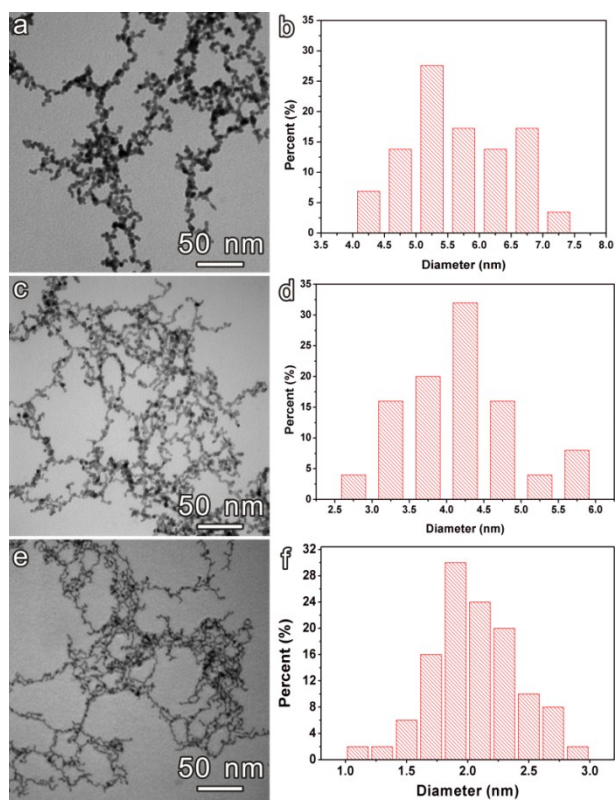

**Figure S8** TEM images and diameter distributions of Pt nanowires obtained at a standard condition except different amount of thiophene. (a and b) 0  $\mu\text{L/mL}$ , (c and d) 0.5  $\mu\text{L/mL}$ , and (e and f) 20  $\mu\text{L/mL}$ .

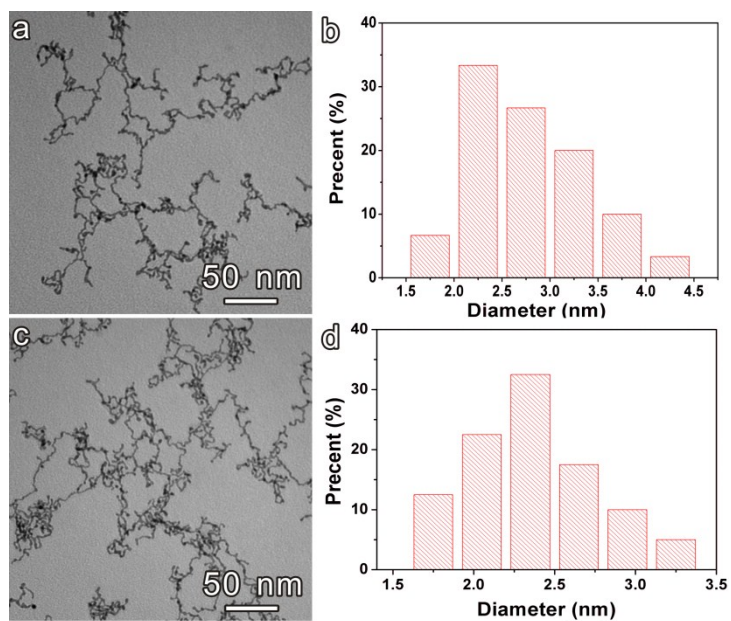

**Figure S9** TEM images and diameter distributions of Pt nanowires obtained at different temperature. (a, b) 140 °C, (c d) 180 °C.

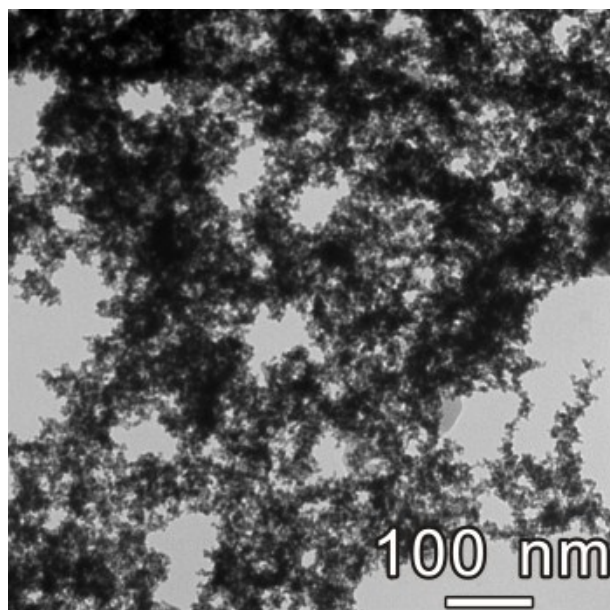

**Figure S10** TEM image of the products obtained in the absence of PVP.

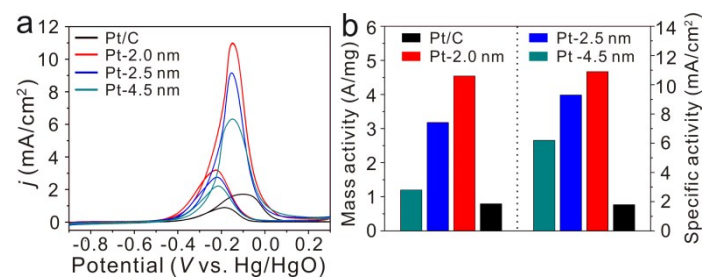

**Figure S11** (a) ECSA-normalized curves of different catalysts for MOR, (b) Mass-normalized and ECSA-normalized activities of four Pt catalysts toward MOR.

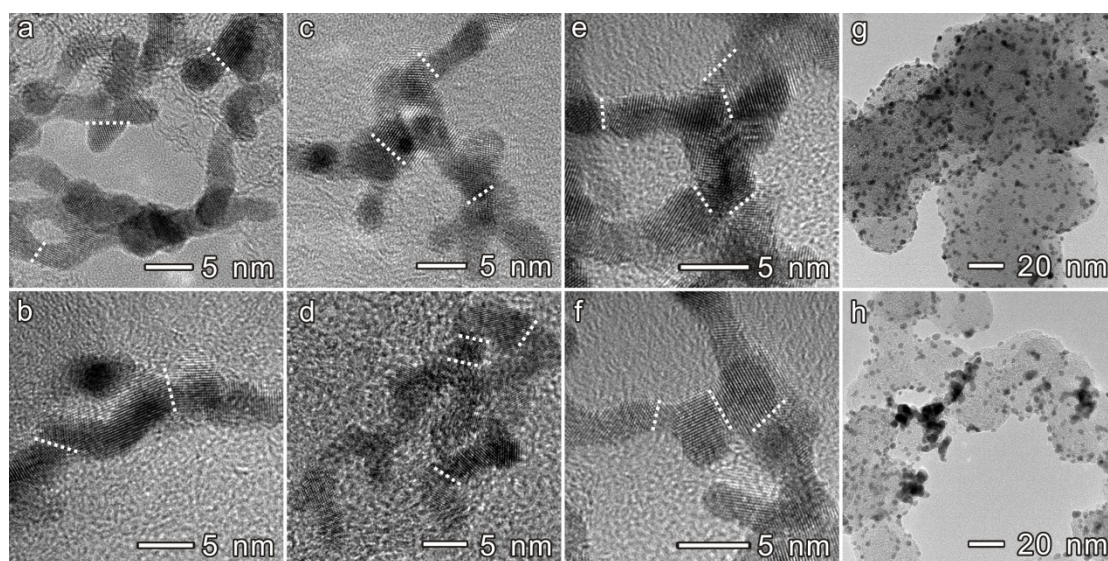

**Figure S12** TEM images of the four Pt catalysts before (a, c, e, g) and after (b, d, f, h) ADTs. (a, b) Pt-2.0 nm, (c, d) Pt-2.5 nm, (e, f) Pt-4.5 nm, and (g, h) Pt/C. The white dashed lines indicate planar defect.
